# Supplementary material
Source: PubMed Central journal article supplement (PMC6432650)

a.

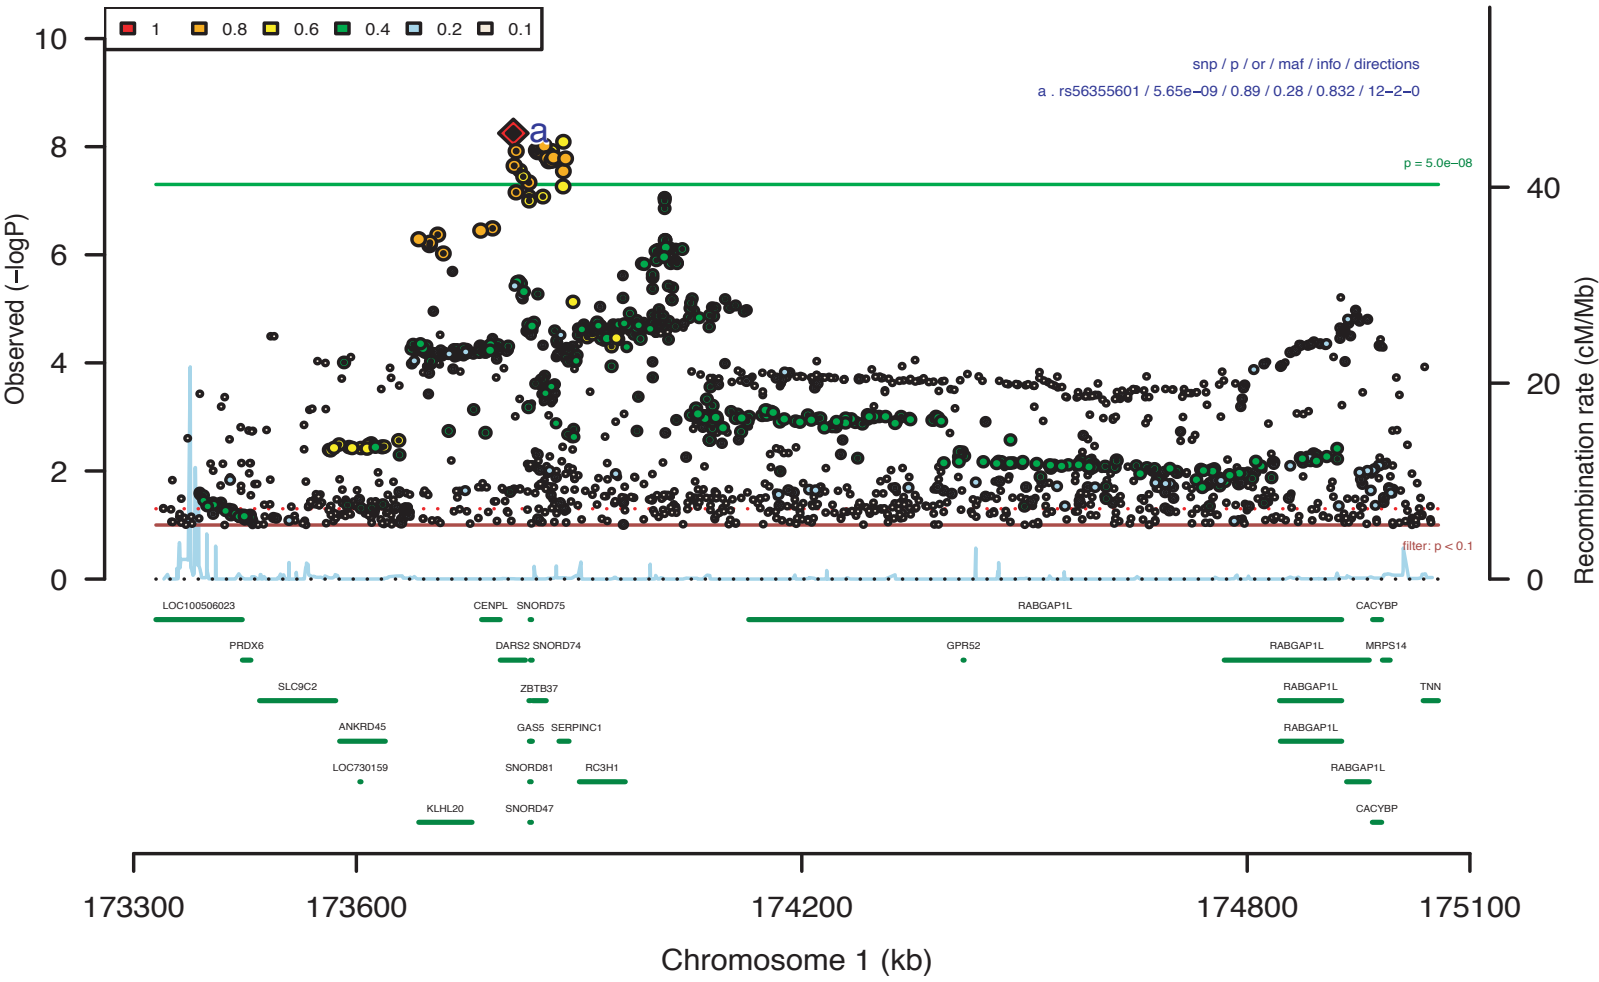

b.

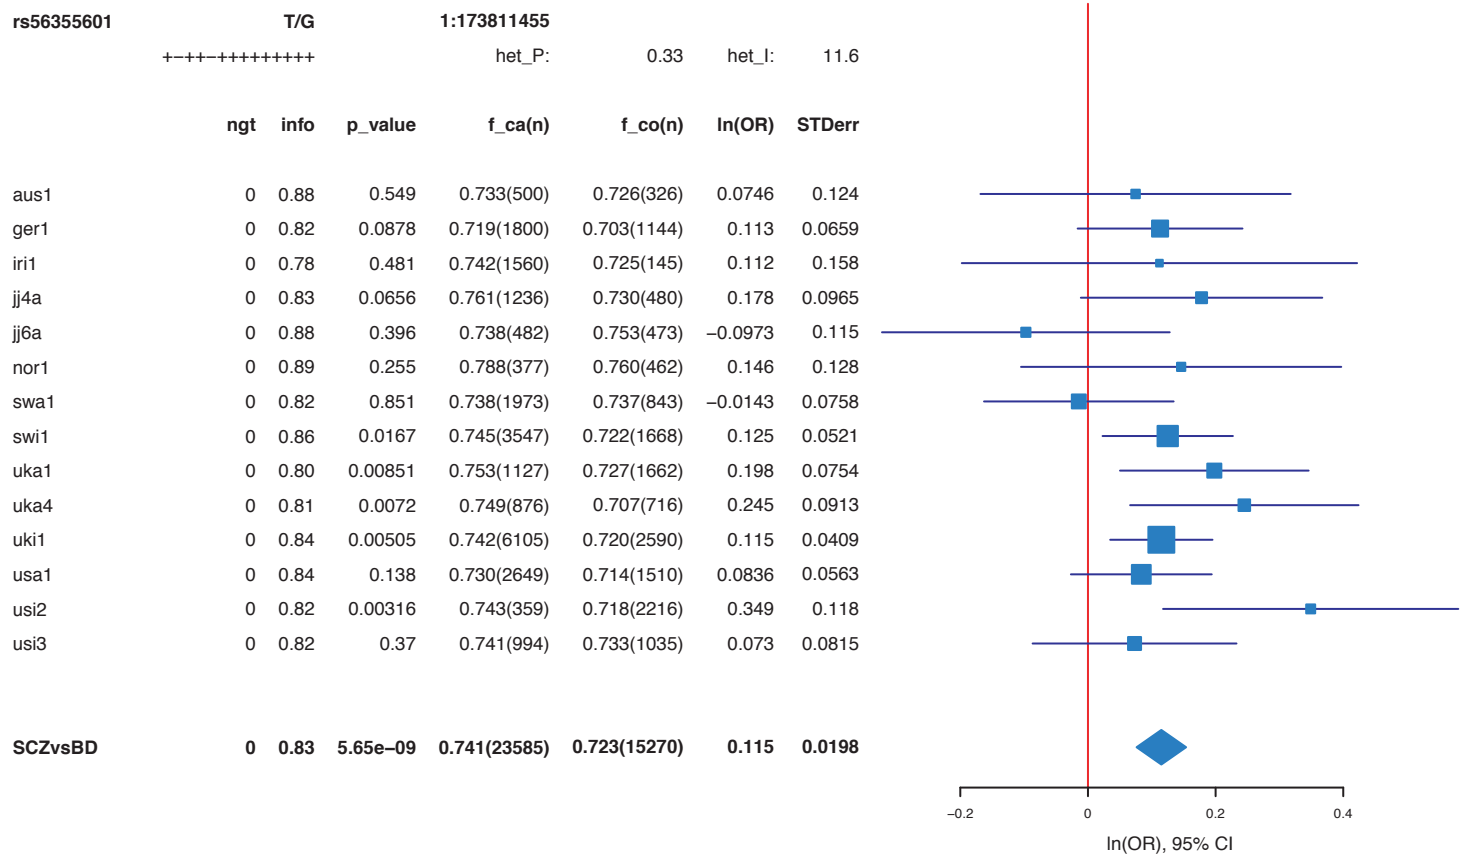

Supplement: NIHMS1009526-supplement-Figure_S1.pdf [file NIHMS1009526-supplement-Figure_S1.pdf]

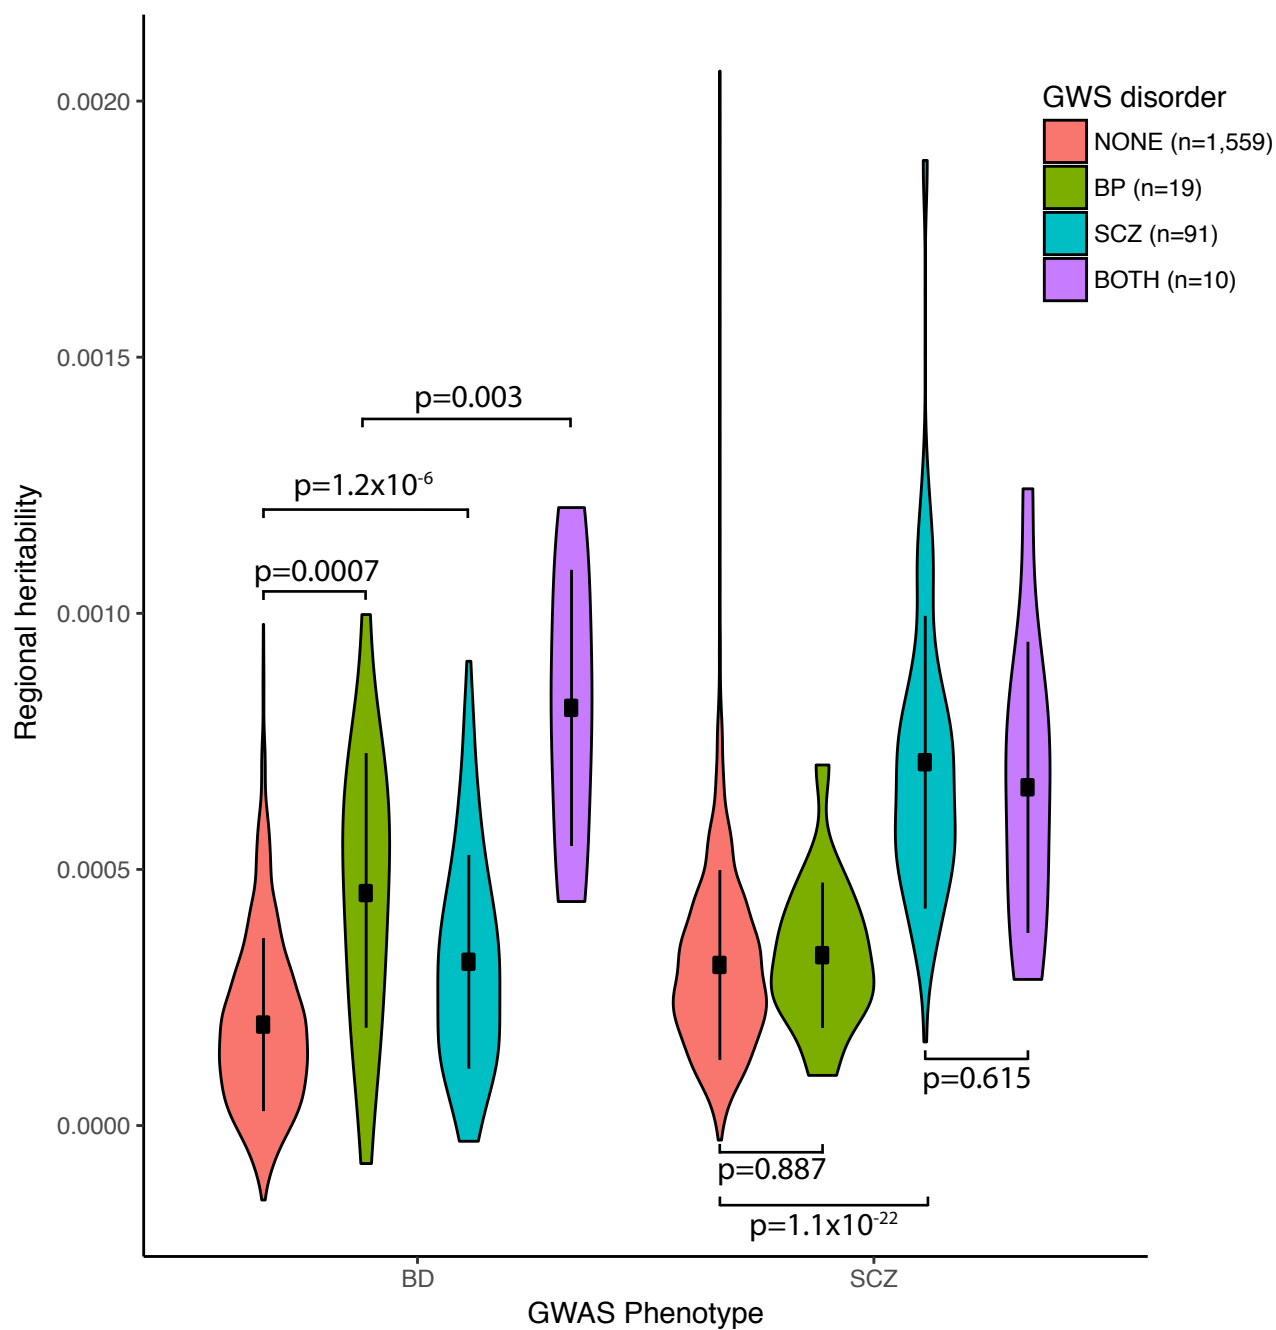

Supplement: NIHMS1009526-supplement-Figure_S4.pdf [file NIHMS1009526-supplement-Figure_S4.pdf]
